# Supplementary material for: Residue management alters microbial diversity and activity without affecting their community composition in black soil, Northeast China
Source: PeerJ. 2018 Oct 10;6:e5754. doi: 10.7717/peerj.5754 (PMC6186157; doi:10.7717/peerj.5754)
Supplement: File S2 [file peerj-06-5754-s002.xls]

## Sheet: 24
		Replicate 1				Replicate 2				Replicate 3
	CK	1	2	3	4	5	6	7	8	9	10	11	12
	A	450	380	380	430	400	420	450	370	500	640	310	370
	B	460	1420	410	380	410	1350	440	370	470	1540	390	400
	C	530	380	450	430	590	430	410	440	520	600	500	440
	D	590	450	380	370	630	440	410	570	610	530	270	410
	E	700	470	490	390	680	400	450	460	870	480	430	400
	F	550	390	470	400	490	380	420	690	540	460	770	400
	G	530	390	750	600	480	510	690	480	440	500	880	610
	H	450	400	550	530	490	440	390	420	430	420	300	420
		Replicate 1				Replicate 2				Replicate 3
	ST	1	2	3	4	5	6	7	8	9	10	11	12
	A	450	290	540	540	560	600	590	420	480	480	830	480
	B	530	1450	3910	570	490	1930	560	550	410	1470	640	460
	C	540	400	450	450	560	560	490	590	3320	560	450	540
	D	650	280	420	540	660	550	430	530	1840	510	590	550
	E	720	360	650	580	760	570	460	490	760	470	490	470
	F	480	400	580	3140	480	820	470	400	530	380	390	410
	G	470	340	840	510	610	2860	670	430	480	380	1720	760
	H	530	280	4860	500	490	600	460	600	470	660	440	450
		Replicate 1				Replicate 2				Replicate 3
	SM	1	2	3	4	5	6	7	8	9	10	11	12
	A	480	540	580	550	560	580	520	560	520	570	540	470
	B	500	1330	620	580	590	1510	580	590	600	1440	530	470
	C	560	530	500	550	600	660	560	580	570	600	490	500
	D	590	550	580	600	690	560	490	540	620	500	490	470
	E	620	550	680	540	680	540	480	510	710	520	530	460
	F	570	560	590	550	570	550	490	510	670	500	520	460
	G	490	550	840	630	510	540	630	510	480	520	760	500
	H	480	540	570	520	500	540	470	500	470	520	500	470

## Sheet: 48
		Replicate 1				Replicate 2				Replicate 3
	CK	1	2	3	4	5	6	7	8	9	10	11	12
	A	1080	2700	1030	2580	1260	2560	1140	2520	1720	2090	1270	1100
	B	1600	1250	1040	2150	1450	1200	1020	2140	1500	1350	1060	2260
	C	2180	820	440	2910	1300	1170	420	1430	2130	1330	350	3600
	D	3690	1200	740	1270	3310	3180	1440	1220	1520	3370	750	1220
	E	1800	3960	830	960	1420	4230	1500	790	870	2610	1570	770
	F	1960	840	750	990	2670	1680	1520	1230	1870	1480	1360	1000
	G	1490	1730	470	620	1710	2360	440	530	1710	1310	380	820
	H	4110	3360	2440	4490	2600	2250	1120	1170	3160	1710	1660	2880
		Replicate 1				Replicate 2				Replicate 3
	ST	1	2	3	4	5	6	7	8	9	10	11	12
	A	750	4640	890	630	600	11350	670	510	560	710	920	1000
	B	680	1300	640	2350	650	1710	570	2660	1410	1320	650	1700
	C	620	710	430	450	550	810	500	850	590	530	440	490
	D	1050	5350	540	2560	3020	2390	500	2740	1100	2980	610	700
	E	990	13060	2100	800	810	4860	590	520	850	850	650	580
	F	1620	720	820	940	930	1240	1010	860	1300	770	520	690
	G	900	810	460	430	1180	2170	440	440	1030	740	1380	650
	H	840	990	890	720	1730	2060	1880	930	1570	1730	650	1400
		Replicate 1				Replicate 2				Replicate 3
	SM	1	2	3	4	5	6	7	8	9	10	11	12
	A	1440	9110	780	630	1520	9560	1070	720	1400	9210	560	520
	B	590	1230	680	3880	1380	1420	590	1340	1200	1450	1250	2260
	C	1200	950	560	710	610	930	580	700	1210	720	510	730
	D	1740	4540	700	3620	3310	4460	740	2910	650	4670	520	470
	E	980	1900	950	570	830	1200	660	800	680	13910	890	480
	F	1280	920	710	870	1220	1000	900	890	1150	1720	740	800
	G	4990	3340	710	660	1050	550	520	480	870	2280	520	580
	H	1000	6640	800	1570	770	5650	1100	1300	790	1250	570	3930

## Sheet: 72
		Replicate 1				Replicate 2				Replicate 3
	CK	1	2	3	4	5	6	7	8	9	10	11	12
	A	1080	15660	4670	5540	1010	14140	5650	4810	1100	16700	6390	4040
	B	10210	1190	10770	9530	5600	1180	7180	8510	6980	1330	9810	8370
	C	3710	1030	490	5910	2170	1420	420	3420	2830	2770	840	5050
	D	11720	4500	4340	3240	6650	10780	4820	1420	8740	10450	3320	2080
	E	2970	18090	5940	1090	1490	17860	7260	1000	1260	15680	7560	1010
	F	1520	8830	5030	1090	2540	1950	3410	1210	2270	8840	4530	1000
	G	4790	11180	740	710	4240	11470	600	570	5170	8490	960	1280
	H	13680	4590	4800	6550	10570	3800	1640	4200	11180	3440	1990	5510
		Replicate 1				Replicate 2				Replicate 3
	ST	1	2	3	4	5	6	7	8	9	10	11	12
	A	790	3080	6680	4070	720	18850	12500	3830	700	1000	5920	4920
	B	4340	1280	1360	8220	5160	1680	2980	5450	10120	1330	3100	14010
	C	2430	4330	440	1660	1090	3400	490	2530	2470	790	630	960
	D	7410	17280	3430	7690	8210	7890	3220	5680	3860	9810	1340	4310
	E	2140	21720	3590	1220	790	18780	800	1400	1060	5020	830	710
	F	1930	5790	4540	1890	1080	6100	5850	2060	1390	4690	3870	1030
	G	6490	10840	680	1790	6450	15100	540	1690	4270	950	1510	940
	H	790	6910	2020	2420	9660	3460	8640	3300	11450	5160	1050	5320
		Replicate 1				Replicate 2				Replicate 3
	SM	1	2	3	4	5	6	7	8	9	10	11	12
	A	2510	17600	16340	730	2460	17570	7260	900	1810	17980	580	3270
	B	3120	1200	6660	11980	8260	1390	850	7230	8260	1430	12690	5560
	C	3610	4160	580	2630	9590	1100	3310	4960	2720	1840	520	1630
	D	8110	19050	3160	8820	7370	19520	4230	7720	1400	19520	2520	480
	E	1920	19340	4640	830	2400	5930	760	2170	760	23380	2680	1180
	F	2850	7430	2400	1050	2160	7840	2540	2970	1310	6790	3650	1190
	G	16290	14020	810	1820	6450	750	950	860	5510	17420	1040	670
	H	1490	7000	1030	4730	740	6110	980	4310	970	1620	830	8140

## Sheet: 96
		Replicate 1				Replicate 2				Replicate 3
	CK	1	2	3	4	5	6	7	8	9	10	11	12
	A	1420	18110	6980	7150	1010	18600	7410	8480	1070	23040	9470	8270
	B	12810	1160	16970	17490	11380	1190	18010	15700	14400	1310	15480	13400
	C	8450	1170	600	9310	3290	2130	610	6110	6340	4820	940	7090
	D	19180	8100	8780	5250	10890	17400	9250	3410	7380	13780	7960	3210
	E	6540	23340	6090	1640	1950	22750	7450	2260	3070	19660	7070	2210
	F	2150	15720	8790	1470	2670	7350	5330	1740	2550	16230	8110	1190
	G	9710	14430	890	750	7570	12220	710	620	10480	12610	5600	3120
	H	20200	5210	9880	9570	17620	4160	6220	7350	17680	3730	7150	7100
		Replicate 1				Replicate 2				Replicate 3
	ST	1	2	3	4	5	6	7	8	9	10	11	12
	A	790	5100	9790	8350	760	21780	19780	7250	710	1160	6620	6720
	B	6170	1360	2020	11920	8770	1630	7840	8280	16710	1300	13560	18700
	C	4030	5380	890	3670	3640	7310	490	5270	7520	1390	520	3610
	D	7510	26230	5520	12520	14800	11210	6080	7620	7340	20600	2850	9320
	E	2420	22040	4000	1750	1280	19980	980	2260	1090	7390	970	1290
	F	2090	13050	7520	2570	1210	13820	8360	4700	1420	9270	6230	1810
	G	12160	11830	770	7810	11640	15030	640	3780	7310	1010	1200	4180
	H	830	4730	4660	3450	17280	3710	10190	4210	19690	4500	1290	6290
		Replicate 1				Replicate 2				Replicate 3
	SM	1	2	3	4	5	6	7	8	9	10	11	12
	A	3320	21030	20690	1360	2920	20730	11010	1130	2150	21280	590	8160
	B	4190	1200	16320	19020	16480	2200	2030	16470	11970	1470	17750	7520
	C	10550	6490	1380	4900	14360	2630	5400	7320	4770	3780	520	2080
	D	13820	24830	5580	14640	9880	25330	5640	13110	3550	25930	5890	560
	E	2030	24980	8930	3420	4120	9120	1710	3580	1210	25530	3430	1510
	F	2950	10590	4090	1370	2300	11060	3780	4610	1410	14140	6710	1860
	G	20930	16100	840	4140	13670	880	1840	6180	12990	19380	2460	830
	H	1940	7310	2420	6930	750	6160	920	6010	1480	1800	940	11780

## Sheet: 120
		Replicate 1				Replicate 2				Replicate 3
	CK	1	2	3	4	5	6	7	8	9	10	11	12
	A	1010	14190	7040	9330	1010	14500	7430	8490	1020	19910	9360	13220
	B	9830	1130	15330	16490	11570	1180	16840	18010	13330	1300	13560	17170
	C	11720	880	620	7620	4360	1800	970	4910	8260	6000	1180	8440
	D	13110	9880	12430	6280	14070	20560	11820	3090	8170	23630	13850	4100
	E	9450	18990	5700	1730	1700	22510	7370	1850	5130	19250	4220	4120
	F	1670	17950	11100	1440	1580	14500	6390	2000	1540	17200	10310	2030
	G	10640	9150	810	790	9830	8840	670	580	15420	9680	6050	3900
	H	21020	4210	9740	11400	22060	4070	6350	9450	21860	3040	7360	7910
		Replicate 1				Replicate 2				Replicate 3
	ST	1	2	3	4	5	6	7	8	9	10	11	12
	A	750	9890	9780	11490	730	23720	23620	8960	690	1360	7090	9370
	B	9650	3550	1700	16240	7810	1610	8300	12410	17390	1280	16710	23350
	C	10460	4190	1540	5410	7380	10360	490	6490	10890	1390	520	4450
	D	11880	28460	6390	17870	18550	13910	8870	9240	11470	25120	5240	10800
	E	2230	24740	3710	2920	3450	22160	1460	3880	1010	8720	1120	1440
	F	1960	17220	9690	5830	1560	17310	10670	7380	1560	12900	6850	2740
	G	22970	11530	1010	12510	21370	14600	790	6570	9570	930	1140	6960
	H	1630	10080	8310	4910	21670	4180	11650	6440	23410	5390	1710	7200
		Replicate 1				Replicate 2				Replicate 3
	SM	1	2	3	4	5	6	7	8	9	10	11	12
	A	2610	21060	20110	3800	2210	21020	11120	1450	1930	21530	600	9210
	B	8070	1910	20020	23900	16380	4680	2260	22760	11820	3040	17790	10340
	C	15010	6630	1840	6820	16830	2310	7150	7860	8420	3270	520	2850
	D	20400	25590	6550	19170	13440	26030	5850	16480	4670	27200	9300	600
	E	1950	27310	10250	5460	3640	10180	2140	4050	1730	26530	3870	2100
	F	3070	11350	3810	1640	2270	15820	5660	5830	1330	18060	10390	2570
	G	23450	15940	890	5940	25900	1050	3280	9710	25620	19050	3840	1350
	H	1710	7370	10300	10310	740	6460	890	9730	2540	2200	1090	15460

## Sheet: 144
		Replicate 1				Replicate 2				Replicate 3
	CK	1	2	3	4	5	6	7	8	9	10	11	12
	A	1130	16060	6340	11330	1280	14870	7300	12400	870	21000	9230	17970
	B	11170	1130	15620	23170	11690	1190	18200	21820	13110	1300	13490	20760
	C	16410	1230	730	9630	7910	1990	1220	5910	13510	8860	1810	11300
	D	17990	12280	15880	11710	16940	26720	15820	5400	14330	27610	15840	5910
	E	12770	25140	5780	4610	2080	25270	7820	3890	9630	23280	5390	6670
	F	2590	19430	14120	2230	2310	20600	10110	4860	1970	18210	16470	3450
	G	17230	11040	2410	840	18800	11180	2000	670	23620	10730	10350	5430
	H	25460	5080	11010	13170	24740	5360	9110	9390	26340	3800	8790	7720
		Replicate 1				Replicate 2				Replicate 3
	ST	1	2	3	4	5	6	7	8	9	10	11	12
	A	740	7310	10230	11850	780	23150	24540	10420	660	1950	6890	10260
	B	8980	6110	5000	20450	7950	1590	7080	14440	16180	1270	18170	24270
	C	14760	4280	2010	7130	10360	13260	490	10580	13560	1650	500	5510
	D	12160	28680	8000	23590	21210	17610	11530	13640	13920	28180	6140	16120
	E	1970	26490	3520	6420	11490	21470	2140	5810	1040	10850	1310	1710
	F	1770	18220	10830	8040	2060	18170	14970	9900	1490	18970	8540	3670
	G	25550	10490	2140	15610	25180	13880	1180	8160	13320	950	1020	9040
	H	2800	11350	10010	5000	24490	3670	9880	7060	25350	4840	1680	9520
		Replicate 1				Replicate 2				Replicate 3
	SM	1	2	3	4	5	6	7	8	9	10	11	12
	A	2990	20910	19300	7490	2890	20990	11160	3610	2070	21500	610	14200
	B	8610	4550	21990	26470	16060	7000	10070	26660	11520	5470	17380	13170
	C	17770	6890	2290	11610	19230	2590	8180	8470	12440	3580	630	3950
	D	21900	26670	7860	22970	16730	26230	6850	18070	6900	27390	14280	620
	E	1940	27420	9420	9810	3630	12370	4710	6490	3190	26890	4080	3010
	F	3170	14210	4950	2390	2170	18540	6890	8500	1340	20830	15290	3580
	G	23210	16120	980	5650	27620	1050	5000	12570	23400	18930	7610	1300
	H	1780	7390	11090	14400	720	6560	870	13740	5370	2170	1090	17570

## Sheet: 168
		Replicate 1				Replicate 2				Replicate 3
	CK	1	2	3	4	5	6	7	8	9	10	11	12
	A	1310	14680	6840	12960	1200	14710	7940	14040	1090	21230	12260	20080
	B	9920	1110	13690	25010	10520	1170	16140	23090	13250	1280	13480	22360
	C	20390	980	1120	8610	9980	1830	1660	5420	17110	10240	2140	12910
	D	14150	13290	18590	12290	18790	26240	18750	5830	14550	26970	18690	7490
	E	13990	20850	5780	5350	1810	25410	7230	3850	12100	19840	5510	8990
	F	2160	18960	15770	3280	2000	24040	11230	8900	1930	18150	21530	7390
	G	17910	9310	3540	790	18740	8900	2430	550	20660	9490	12590	5490
	H	21460	4590	10570	13940	23980	4790	8570	8910	24270	3300	9350	7180
		Replicate 1				Replicate 2				Replicate 3
	ST	1	2	3	4	5	6	7	8	9	10	11	12
	A	740	7310	10590	10060	760	20500	24410	12290	670	1980	5970	11660
	B	8980	8210	11730	22750	7440	1570	11290	16720	13890	1250	16460	24920
	C	17910	4160	2510	8570	12820	15250	490	13590	15040	1880	490	5620
	D	12330	27660	8630	26000	23200	19860	13870	17420	15450	26030	7100	18560
	E	2330	27730	3110	11280	19550	19920	3550	7960	970	12570	1580	1770
	F	2020	17890	10660	9120	3100	17920	17350	13300	1640	19890	11250	6650
	G	26540	10740	5920	19530	25160	13810	1940	8460	21250	1000	1060	11610
	H	8650	12490	10590	5080	25850	4410	13870	8900	25880	5460	2090	10010
		Replicate 1				Replicate 2				Replicate 3
	SM	1	2	3	4	5	6	7	8	9	10	11	12
	A	2980	20690	18620	8130	2560	20850	10950	5630	1830	21410	640	15990
	B	9980	6440	21020	27620	15640	8720	13380	27790	11050	7160	17000	16210
	C	18680	6810	2930	13930	20640	2770	10200	9420	13990	3730	1100	5140
	D	21480	26460	8390	25030	17940	26230	7860	19240	6920	27150	18020	630
	E	2010	28040	9800	14040	4020	14380	9170	10140	9450	26840	4180	4970
	F	3290	17330	7570	6280	2360	17990	7670	11680	1560	22610	17190	4920
	G	22900	15410	1690	6050	28490	1120	8370	15330	28450	18980	8340	1590
	H	2700	7400	10590	14620	840	6580	1100	15420	10670	3090	1850	17560

## Sheet: 192
		Replicate 1				Replicate 2				Replicate 3
	CK	1	2	3	4	5	6	7	8	9	10	11	12
	A	1610	16820	6840	14180	1330	15830	8080	15250	980	22380	17870	21500
	B	11600	1100	17900	25930	11770	1170	18440	23860	13360	1290	14010	23810
	C	24270	1430	1710	16520	15380	2790	2300	8660	22390	12690	2790	15250
	D	22650	15190	20130	16750	21220	28190	21330	9830	19780	28370	18310	8780
	E	16610	25480	5820	8220	2490	25470	7460	7800	15480	22910	5810	10340
	F	4130	19030	15790	6940	3720	24780	12260	13530	3230	17980	18850	11120
	G	23140	13290	8260	810	24390	13070	3160	700	26670	11700	14950	6320
	H	24440	7430	10670	15280	24380	6710	10570	8650	26200	5540	9080	6870
		Replicate 1				Replicate 2				Replicate 3
	ST	1	2	3	4	5	6	7	8	9	10	11	12
	A	860	7540	13750	9000	830	21120	24350	13690	690	2920	5990	13010
	B	10060	13040	15340	24280	8360	1540	19480	19410	17580	1250	17310	24940
	C	17690	6140	3450	9870	14820	17030	490	16960	17540	2410	530	6140
	D	12800	28790	10030	27620	25100	21960	16360	20250	17770	29370	7890	19180
	E	2720	27460	3660	15630	26690	23120	4460	10880	1350	13700	2010	3600
	F	2980	17700	10640	10530	4590	17830	17680	16910	1680	19530	12910	10770
	G	26490	13180	9690	21570	25600	14090	4860	8750	22850	1410	1740	13610
	H	12150	11480	12090	6480	26060	4700	13090	8520	25680	5880	3600	10730
		Replicate 1				Replicate 2				Replicate 3
	SM	1	2	3	4	5	6	7	8	9	10	11	12
	A	2810	20690	18090	7680	2270	20910	11090	7210	1850	21370	660	17150
	B	10090	8060	20710	27910	15390	10510	16850	28390	10690	8680	17180	19740
	C	18500	7190	4120	15840	21920	2900	12590	10370	15780	3410	1850	9050
	D	21570	26570	8380	26160	19510	26680	8060	18890	10020	27160	19850	650
	E	2130	28410	8890	16530	4640	16350	8830	14900	15220	27040	3880	7320
	F	3440	20760	9960	9350	2580	17710	8030	15650	1780	24080	17050	6980
	G	22810	15240	3850	6840	28580	1210	13260	19230	28590	19090	10220	1880
	H	2940	7480	10420	14060	820	6590	930	14110	14900	3940	1950	17480

## Sheet: 216
	CK	Replicate 1				Replicate 2				Replicate 3
		1	2	3	4	5	6	7	8	9	10	11	12
	A	1710	16970	7070	15040	1110	14990	8650	14940	960	22100	18010	22210
	B	11680	1100	18020	25870	11140	1160	18750	23960	13370	2280	14010	23510
	C	25920	1610	2350	18590	17820	2800	2750	9490	24400	14060	3280	17130
	D	24360	16280	19830	18220	22730	27760	22370	9100	20970	28390	21050	10050
	E	18280	25130	5800	8890	2530	25180	7350	9880	14590	22360	5800	11210
	F	4630	18670	15830	8450	4220	24600	12010	15080	3690	17920	18780	13260
	G	23560	13610	9770	780	23450	12100	3600	650	25650	11230	16370	6910
	H	24330	7100	10720	15770	23620	6640	11240	8330	25670	5680	9060	6760
	ST	Replicate 1				Replicate 2				Replicate 3
		1	2	3	4	5	6	7	8	9	10	11	12
	A	830	6920	14830	8610	780	19930	24320	14180	750	2600	5790	13890
	B	9220	19470	17570	25140	7770	1510	22550	21440	15860	1240	16010	25210
	C	17820	5850	4330	10490	16180	18750	490	19340	19100	2570	530	5540
	D	13000	29460	10970	28220	25830	23180	18460	21600	19670	28860	8340	17650
	E	2750	26870	3830	18750	28270	22280	4390	11550	1220	15210	2230	3100
	F	2610	17220	10600	11880	4560	17700	17450	18780	1740	19050	13510	13380
	G	25960	14410	11810	23080	24540	13770	3230	9070	21160	1240	2810	17290
	H	14240	14790	12210	7580	25690	4890	12650	8150	25840	5810	3710	10810
	SM	Replicate 1				Replicate 2				Replicate 3
		1	2	3	4	5	6	7	8	9	10	11	12
	A	2970	20660	17910	9830	2900	20890	11090	10380	2030	21370	690	18070
	B	10700	9190	21170	28250	15340	11580	20070	29090	10800	9540	17220	20040
	C	19100	7070	5250	17310	22800	3370	14330	12500	16920	3870	2350	10820
	D	21770	26640	8250	26400	20270	26940	8030	18860	11800	27010	19550	660
	E	2190	27860	8490	18210	3890	17610	9760	17260	18880	27160	3920	9100
	F	3520	20160	11260	8940	2320	17520	7300	18530	1510	25640	16840	8000
	G	22760	14930	4240	5210	28530	1220	13970	21760	26490	19130	10360	1790
	H	2760	7480	11290	13470	810	6530	900	13190	17540	3450	1680	17980
