# Supplementary material for: Residue management alters microbial diversity and activity without affecting their community composition in black soil, Northeast China
Source: PeerJ. 2018 Oct 10;6:e5754. doi: 10.7717/peerj.5754 (PMC6186157; doi:10.7717/peerj.5754)
Supplement: File S3 [file peerj-06-5754-s003.xls]

## Sheet: 24
		Replicate 1				Replicate 2				Replicate 3
	CK	1	2	3	4	5	6	7	8	9	10	11	12
	A	450	530	540	500	680	540	490	540	620	530	510	470
	B	450	1980	640	570	480	2180	780	730	510	2200	1010	510
	C	770	470	440	620	770	6700	450	690	2260	480	430	590
	D	600	460	460	500	2780	6240	490	700	1960	420	520	480
	E	520	440	1080	490	540	510	440	1050	530	500	420	440
	F	530	480	670	1400	460	530	480	490	510	390	490	470
	G	440	540	680	450	470	500	630	510	3430	420	700	430
	H	440	670	460	480	400	650	490	600	450	390	4830	430
		Replicate 1				Replicate 2				Replicate 3
	ST	1	2	3	4	5	6	7	8	9	10	11	12
	A	490	510	570	540	730	570	420	580	520	810	540	470
	B	510	2030	630	590	610	690	1310	690	450	2250	570	470
	C	630	500	460	720	1450	560	450	600	880	540	460	500
	D	560	500	520	560	1660	550	500	4440	580	570	420	430
	E	520	490	500	520	590	4710	2370	510	600	530	440	440
	F	530	700	570	430	480	540	490	520	550	540	580	460
	G	470	520	710	450	2160	500	690	540	480	2860	650	1180
	H	460	660	3040	500	490	630	480	500	490	490	530	450
		Replicate 1				Replicate 2				Replicate 3
	SM	1	2	3	4	5	6	7	8	9	10	11	12
	A	430	410	430	540	470	410	400	380	420	370	580	480
	B	480	1990	580	620	510	2000	550	420	540	2070	520	380
	C	640	470	530	720	990	5610	430	430	710	400	470	540
	D	520	490	460	590	560	460	410	450	550	370	390	380
	E	630	480	940	540	1240	440	450	420	530	420	570	390
	F	560	420	470	490	450	510	430	450	530	420	490	480
	G	460	480	660	440	450	470	630	630	430	430	640	4720
	H	450	690	470	410	380	500	430	410	400	610	520	460

## Sheet: 48
		Replicate 1				Replicate 2				Replicate 3
	CK	1	2	3	4	5	6	7	8	9	10	11	12
	A	690	810	680	520	620	860	600	780	740	530	520	670
	B	1280	1760	670	750	730	1860	740	660	500	1890	780	440
	C	1060	510	430	510	1080	6970	410	580	760	750	430	480
	D	640	500	500	1930	1270	1340	500	790	1310	630	520	1200
	E	680	800	1700	590	570	820	540	570	630	1170	550	500
	F	530	620	740	840	900	580	660	650	760	380	660	600
	G	680	700	520	410	550	730	470	620	610	2140	520	470
	H	500	450	820	750	540	470	430	850	620	1000	1060	440
	ST	1	2	3	4	5	6	7	8	9	10	11	12
	A	690	8720	3440	780	790	9200	3420	770	660	8840	3330	730
	B	1660	1690	1100	2780	2020	9430	1720	2210	1740	1890	800	1810
	C	1540	760	530	710	2100	750	440	640	1510	800	460	660
	D	2960	5270	650	2090	2360	5480	690	2330	2130	5420	660	1750
	E	760	10070	790	1130	710	10550	4400	750	720	10490	670	720
	F	1090	880	660	940	1270	770	580	1110	1160	720	710	980
	G	5350	3010	570	1620	5760	2750	510	670	5730	3460	580	1260
	H	780	5230	800	750	770	4900	790	680	960	5060	710	950
		Replicate 1				Replicate 2				Replicate 3
	SM	1	2	3	4	5	6	7	8	9	10	11	12
	A	690	11350	8030	1380	800	10700	8920	760	940	11390	8810	820
	B	2350	1730	2390	3080	4630	1750	2330	4660	4350	1820	1820	4740
	C	2490	790	570	870	3530	7450	490	590	3660	1210	460	930
	D	2140	7360	1120	4020	2630	6430	710	3240	4070	6110	1320	3000
	E	790	12620	1450	1050	1430	13040	670	710	1150	12470	890	670
	F	1100	850	820	1100	1380	990	880	1100	1060	1010	840	940
	G	7530	7460	700	760	8350	7480	570	1910	7360	8560	660	5130
	H	1230	6210	820	5510	840	5560	690	1720	750	5850	1690	1760

## Sheet: 72
		Replicate 1				Replicate 2				Replicate 3
	CK	1	2	3	4	5	6	7	8	9	10	11	12
	A	690	780	6320	3840	860	830	3930	4860	860	550	520	5480
	B	4750	1720	720	9570	4010	1810	690	870	4170	1850	1050	1210
	C	4310	4540	520	4330	3060	7020	420	1180	1340	1040	480	610
	D	1730	780	3060	5060	2720	6570	820	5330	4070	7170	3100	5820
	E	860	5160	2010	1220	820	3570	690	870	730	4540	660	880
	F	900	1080	5420	1360	1110	4570	780	1480	1180	410	1290	1010
	G	830	950	590	520	780	780	570	3600	980	14900	870	1520
	H	580	730	1190	2370	660	920	980	1290	600	2260	1230	600
		Replicate 1				Replicate 2				Replicate 3
	ST	1	2	3	4	5	6	7	8	9	10	11	12
	A	940	16910	15880	4010	1370	17180	17780	4690	1210	17570	16150	5820
	B	9140	1630	16260	9130	9880	10150	18330	11000	10520	1820	13270	10970
	C	10750	3930	2830	3160	7120	2340	2160	2490	8080	2940	550	1820
	D	9480	17060	1450	6470	10240	17610	4020	7890	8000	18000	3470	6890
	E	2420	19160	1890	4590	3990	12370	3540	3190	1810	19370	3010	1390
	F	3150	4670	2770	4290	3420	4390	3630	3430	2250	3510	4580	1700
	G	17600	15820	820	4360	20830	16170	660	4190	19110	15050	670	1300
	H	1400	5100	2630	2090	1210	5530	4650	2830	7630	5340	7250	5370
		Replicate 1				Replicate 2				Replicate 3
	SM	1	2	3	4	5	6	7	8	9	10	11	12
	A	900	20330	16500	9610	1020	18700	17680	6690	1180	20420	17450	8320
	B	8270	1670	16980	14080	13640	1930	16810	18150	14080	1760	11730	19410
	C	11090	4590	740	5590	12410	9680	670	3210	10910	3340	1090	5570
	D	8490	16850	4750	9230	8710	14770	6400	10400	11570	19330	10120	10840
	E	4820	20420	2530	4800	3330	20120	3650	1950	2930	19710	1800	1010
	F	4170	7720	4260	3330	4840	5530	3710	3410	3080	6090	2920	1300
	G	14850	18070	800	2260	16950	14420	1020	9640	20180	14930	1060	5450
	H	10820	7860	7130	15420	4100	6370	4970	11060	1100	5960	6380	10860

## Sheet: 96
		Replicate 1				Replicate 2				Replicate 3
	CK	1	2	3	4	5	6	7	8	9	10	11	12
	A	680	780	9990	8780	730	790	6980	6290	790	630	540	8490
	B	6880	1670	870	17330	7230	2470	680	7160	8040	1770	980	4430
	C	9570	6460	690	6380	7810	6820	420	3090	1510	970	480	1710
	D	4580	7810	9290	5550	6860	12660	1080	6980	7950	12930	5850	10660
	E	830	7440	4040	3660	850	5770	900	1090	820	5910	790	1390
	F	960	3550	8220	2170	1050	7310	720	4790	1140	750	2200	1700
	G	850	890	890	790	850	800	900	6180	2400	15800	1890	4100
	H	610	780	1620	3640	630	830	1830	3830	700	2180	4680	1900
		Replicate 1				Replicate 2				Replicate 3
	ST	1	2	3	4	5	6	7	8	9	10	11	12
	A	940	19360	19510	6890	1450	21080	21710	7900	1140	20360	20730	10290
	B	11160	1620	20270	14170	14760	8750	22400	16360	14500	1770	19090	16000
	C	13980	6630	5310	5010	13420	2880	4730	3020	13220	5180	1230	2500
	D	12840	25180	2990	12550	15500	24760	6050	14410	10540	25680	5010	11330
	E	2290	23130	2680	4750	4380	17270	3520	5440	2010	22700	3800	2410
	F	3160	6920	3420	7250	3260	7130	6400	5900	2240	7040	7560	3640
	G	22600	16840	3350	6020	24680	16420	760	6360	23310	14540	730	3610
	H	1680	4580	8680	3610	1430	5150	8300	3920	17070	5280	11720	7740
		Replicate 1				Replicate 2				Replicate 3
	SM	1	2	3	4	5	6	7	8	9	10	11	12
	A	910	21570	19070	22860	1290	20730	21390	12180	1140	21650	20270	14340
	B	10030	2460	21070	21210	17140	2740	20130	23420	13840	1730	14100	23570
	C	14840	5780	880	8200	17480	10550	2470	8600	16710	3720	2010	6350
	D	13470	20620	7570	16690	13050	19930	9570	19100	15860	25400	13840	18460
	E	9620	22570	2950	10120	8230	21980	7160	4900	9450	22190	3330	1580
	F	8420	13890	8000	6990	11530	8470	5750	7140	7000	10870	6000	3750
	G	19410	17820	3940	6880	21520	14200	2200	15430	24510	14360	2040	6290
	H	23270	7910	12760	15040	12820	7230	8270	12130	2560	5780	10100	12630

## Sheet: 120
		Replicate 1				Replicate 2				Replicate 3
	CK	1	2	3	4	5	6	7	8	9	10	11	12
	A	680	750	9690	11770	710	880	8070	8960	710	760	550	11370
	B	6660	1680	14010	20620	9860	4680	1190	10940	10260	3340	1710	8830
	C	12350	10230	1290	8350	12270	6930	420	5490	2240	930	460	3880
	D	5440	11090	10020	10620	10510	16830	1480	8900	11180	16970	7940	16320
	E	930	8820	3290	6190	1170	6950	1230	2410	870	6680	910	2820
	F	1280	6530	9770	5060	1130	9210	730	9380	1120	4610	3000	2630
	G	840	10840	1430	1040	1660	850	1930	7700	6240	15630	5560	6360
	H	590	920	3450	5670	640	820	4060	5220	1190	2070	9990	2940
		Replicate 1				Replicate 2				Replicate 3
	ST	1	2	3	4	5	6	7	8	9	10	11	12
	A	960	19210	19750	12670	1430	21030	22530	11460	1170	20210	21050	14890
	B	10930	1600	22010	17980	15180	4290	24170	21480	13550	1730	20280	22220
	C	17120	9040	6590	5220	16760	2860	6000	3550	16550	9250	1730	3260
	D	15740	27100	4780	19370	16940	26340	6750	20110	13040	26800	6110	14930
	E	2220	24090	2890	5140	4410	19150	3360	7220	1980	23700	3770	4010
	F	3090	8850	4720	10690	3120	10280	9410	9150	2300	9980	9960	8090
	G	24970	16350	7380	7170	25820	15660	850	7610	25060	14230	740	6240
	H	2070	4570	9610	5210	1720	4970	7720	4560	23090	5250	11420	8970
		Replicate 1				Replicate 2				Replicate 3
	SM	1	2	3	4	5	6	7	8	9	10	11	12
	A	940	20900	18970	26320	1290	19990	21380	17150	1220	21510	19350	16760
	B	10120	5210	20710	25080	20240	7580	21520	23650	13580	1700	14100	26550
	C	15330	8550	870	10950	20030	8270	5430	12270	19510	4120	4180	8540
	D	17530	21960	8920	20580	17160	21760	11390	23460	20630	27070	16010	21790
	E	12660	23830	4890	13110	14880	23040	10330	10850	17920	23320	4650	2650
	F	13000	16630	10670	10260	16280	14070	7950	10710	10750	16610	9310	8590
	G	22160	17190	8510	11330	23920	13780	3980	19010	26560	13940	3350	8680
	H	26540	7750	12390	14550	21520	7640	10040	11960	8750	6040	10820	15750

## Sheet: 144
		Replicate 1				Replicate 2				Replicate 3
	CK	1	2	3	4	5	6	7	8	9	10	11	12
	A	710	880	9670	15190	780	1050	8280	13820	890	770	560	11440
	B	7980	1670	17370	22520	12010	6850	2420	13390	11920	6010	2960	12390
	C	12380	13270	1720	8540	15550	7110	420	6660	4320	990	460	5750
	D	6250	5890	11030	11920	11290	20460	3710	9510	11150	19890	10260	18850
	E	1290	10060	4690	6600	2280	7640	1850	3960	860	6730	1210	7060
	F	1620	7800	10790	5840	1060	9870	690	12530	1050	7380	4230	4270
	G	900	14110	2350	1950	5400	760	3680	8450	7930	15290	6500	8460
	H	560	1100	3880	6290	640	770	5180	6570	2740	1740	12640	3620
		Replicate 1				Replicate 2				Replicate 3
	ST	1	2	3	4	5	6	7	8	9	10	11	12
	A	850	19020	19490	15940	1490	20850	22140	14720	1280	20060	20570	16390
	B	11020	1670	22580	20460	14730	6710	23920	24370	13230	1720	19770	24330
	C	17970	10630	7900	7220	21000	3040	6860	4040	20400	11940	2080	4360
	D	18230	27470	5550	21900	18520	26500	7020	22490	13670	27060	7520	16620
	E	2170	24230	3300	5900	4590	20590	7170	8420	1940	24500	4030	6230
	F	3030	12560	6030	12670	3020	12930	11810	11540	2310	13260	12590	10060
	G	25900	16200	10180	7830	26040	15250	1110	8010	25460	14120	820	7700
	H	2360	4560	10450	6720	2010	5020	7180	4600	22860	5310	12470	9210
		Replicate 1				Replicate 2				Replicate 3
	SM	1	2	3	4	5	6	7	8	9	10	11	12
	A	1010	20720	18610	27020	1220	20020	21100	18250	1230	21440	19360	17220
	B	10560	8050	20550	27100	23080	19670	21490	24420	13310	1690	13930	26860
	C	17420	11370	990	13400	22050	10200	7720	14940	22440	5020	6010	11410
	D	20010	22340	10180	22330	20100	22580	12930	25620	23370	27640	16250	22210
	E	16840	24160	5370	16790	19750	23700	9650	16330	22960	23960	5200	3940
	F	16760	16710	12380	13570	20350	16550	10410	14660	14630	20470	13560	9830
	G	23000	17230	12690	14400	25560	13780	7430	21900	27170	14220	5490	11900
	H	26610	7750	13900	14890	24600	7900	10790	12010	14850	6330	12490	16450

## Sheet: 168
		Replicate 1				Replicate 2				Replicate 3
	CK	1	2	3	4	5	6	7	8	9	10	11	12
	A	690	860	9880	16800	690	1150	6820	15980	690	750	580	12100
	B	8840	4500	19560	24280	14190	8940	3730	11640	13930	8760	4460	15100
	C	12190	16360	1930	9570	18410	7440	420	7920	6310	860	460	7650
	D	8690	18920	11670	12370	11920	22400	6290	10540	11810	22190	11900	18310
	E	2870	12270	4520	8930	3730	10260	7530	10330	1060	8290	1620	9690
	F	6760	9720	11970	9550	1500	9680	950	16680	1310	10220	6990	6920
	G	900	13920	5510	2930	8930	910	8950	9670	10230	15110	9740	11240
	H	600	1780	6790	8180	740	1130	11860	9130	9890	2000	13520	5360
		Replicate 1				Replicate 2				Replicate 3
	ST	1	2	3	4	5	6	7	8	9	10	11	12
	A	1060	18830	19390	18270	1340	20650	21860	17350	1190	19830	20240	18370
	B	11370	8060	22550	21200	14550	11470	23970	26220	12850	1700	19170	24600
	C	18900	12530	9300	9390	24650	3070	8130	8500	21790	16050	3380	5980
	D	18060	27200	6400	23360	20520	26640	7370	24130	12430	26940	7900	17240
	E	2110	24700	3980	8770	5370	20950	4380	10620	2030	24690	4310	8730
	F	3230	18460	7490	15820	3310	14990	15140	14960	2450	16400	14360	11790
	G	26140	16340	12930	8690	26100	15010	2400	8880	25040	14400	1300	8380
	H	3190	5780	9910	10320	4690	5040	6940	6450	22800	5580	13800	8880
		Replicate 1				Replicate 2				Replicate 3
	SM	1	2	3	4	5	6	7	8	9	10	11	12
	A	1160	20500	18400	26990	1200	19850	21430	19130	1240	21140	19040	18350
	B	10880	9620	20310	27750	23750	23530	21300	25310	13190	1690	13800	26870
	C	17300	13960	1460	16880	22490	12580	11480	17710	24410	10620	9960	13580
	D	20490	22680	9810	22170	21930	22950	13010	26790	25640	28430	16860	22050
	E	21470	23890	5430	20660	24470	23600	9440	21250	27320	23230	5180	6610
	F	19830	16570	15270	18780	23620	16770	13020	19700	18420	23350	15230	11480
	G	22360	16870	17760	16840	24770	13610	9690	23790	26760	14060	7650	14270
	H	26350	8170	14570	15170	25640	7880	10970	12400	20890	6380	13010	16170

## Sheet: 192
		Replicate 1				Replicate 2				Replicate 3
	CK	1	2	3	4	5	6	7	8	9	10	11	12
	A	690	1320	9820	17000	910	1680	8130	16110	1080	850	600	13260
	B	8080	10500	20130	24360	16190	10630	5050	14340	14500	10720	6390	17950
	C	11920	18470	2020	10220	19900	7380	420	8680	10080	1050	470	9340
	D	9410	25440	13150	12620	12530	22720	7490	11450	11910	23650	12770	18500
	E	3610	12350	6760	7560	3900	10500	9560	13680	950	8080	2200	11020
	F	8510	10310	11730	9100	1320	9430	780	16670	1030	8440	7050	8710
	G	890	14080	8170	3710	16930	820	6000	9970	10660	14070	9050	13700
	H	540	1500	5120	6360	770	780	6770	6860	13950	1580	13970	5920
		Replicate 1				Replicate 2				Replicate 3
	ST	1	2	3	4	5	6	7	8	9	10	11	12
	A	1170	18770	18580	18050	1430	20500	22060	18290	1370	19730	19980	19530
	B	11010	22060	22560	21500	14510	13720	23930	26660	12770	1690	18930	25170
	C	19100	13720	10840	10830	25870	3010	9720	10400	23650	19410	4530	7610
	D	18030	26780	6070	23070	21240	26440	7580	24060	14830	26600	7970	16850
	E	1980	25000	3630	10120	7130	21110	4320	12670	1860	24810	4480	9750
	F	2950	21120	8810	17450	2970	14900	19540	17080	2280	17350	14290	12490
	G	25820	15690	12770	9430	25890	14760	4700	9340	24730	13730	3810	8370
	H	3550	5180	9390	8670	8160	5080	6630	7530	21830	5390	13990	8230
		Replicate 1				Replicate 2				Replicate 3
	SM	1	2	3	4	5	6	7	8	9	10	11	12
	A	1470	20530	18370	26800	1200	19620	20900	20500	1320	21030	18870	19460
	B	10660	9970	20370	27960	23470	24030	21490	26190	13780	1680	13900	25820
	C	17880	16300	2120	19830	25490	14640	14240	19760	25560	12920	13320	14320
	D	19440	22710	9820	21170	22470	23020	12790	27460	26350	28730	17200	22050
	E	20980	23660	5310	22540	25870	23420	9470	23240	28390	22930	4850	8920
	F	20590	16250	17590	21790	24350	16520	14810	22770	19960	24630	14680	12730
	G	21930	16960	21900	18780	24100	13400	10690	24120	26460	13980	8630	15810
	H	26300	8470	13760	14460	25570	7860	10710	11860	23370	6330	12970	16130

## Sheet: 216
		Replicate 1				Replicate 2				Replicate 3
	CK	1	2	3	4	5	6	7	8	9	10	11	12
	A	700	1140	10120	17320	740	2110	6630	17980	740	880	620	15200
	B	9230	18450	19680	24070	17980	11280	7320	14380	14440	11250	7250	19170
	C	12150	20830	2130	10720	20850	3480	420	9830	13250	970	480	10810
	D	9770	26420	13230	12740	13640	23590	9790	12490	12490	24360	12740	18150
	E	4580	14020	2750	10120	4700	12520	14360	17040	1400	9910	2760	13100
	F	9910	12320	11710	11650	1770	9180	1120	17090	1340	12720	9650	10110
	G	900	14190	11090	4660	19360	1090	11280	10930	12930	14510	12400	13550
	H	620	3050	8620	8340	880	1210	12290	8750	17570	1970	14880	7230
		Replicate 1				Replicate 2				Replicate 3
	ST	1	2	3	4	5	6	7	8	9	10	11	12
	A	1200	18630	18300	21170	1380	20360	21790	17800	1320	19610	19780	20650
	B	11050	24550	22540	21490	14430	13700	23910	26810	12420	1680	19130	25060
	C	19060	15150	12130	11700	26550	3420	10800	12230	25110	20590	5150	8690
	D	17440	26580	6720	23610	22540	26490	7740	25430	17540	26380	7720	15900
	E	2070	25210	4160	10660	9490	21140	4710	14440	2010	24890	4390	11180
	F	3340	21480	10940	19070	3380	14940	21560	18420	2480	17060	14360	13730
	G	25710	15700	14850	10190	25860	14790	8320	9820	24530	13810	9330	8500
	H	4590	6280	9230	10250	15100	5340	6900	8240	21720	5960	13930	7950
		Replicate 1				Replicate 2				Replicate 3
	SM	1	2	3	4	5	6	7	8	9	10	11	12
	A	1660	20480	18240	26520	1160	19330	20300	21730	1280	20940	18730	19550
	B	10530	9980	20250	28130	22850	24010	21290	26240	13310	1680	13980	25710
	C	18780	17920	2650	21460	26510	16160	14270	21120	27500	14480	14780	14760
	D	18460	23050	9830	20900	22460	23240	12530	26800	26330	28790	16770	21440
	E	21150	23360	5290	24440	26700	23300	9510	24280	28740	22770	4980	11810
	F	20490	16090	17780	23770	24930	16470	17010	24310	21320	25110	14580	13520
	G	21700	16960	23080	20300	24170	13340	13170	25640	26190	13970	8970	16340
	H	26230	8410	14010	14470	25390	7730	10150	11750	23930	6320	12490	16240
